# Supplementary material for: Gastric Cancer and the Daily Intake of the Major Dish Groups Contributing to Sodium Intake: A Case-Control Study in Korea
Source: MDPI journal article supplement (doi:10.3390/nu13041365), 2021-04-19
Supplement: s1 [file s1]

**Table S1.** Association gastric cancer and intakes of noodles and dumplings according to family history of gastric cancer or *H. pylori* infection.

| Noodles & dumplings                     | No. of case/control | OR   | 95 %CI <sup>‡</sup>       |
|-----------------------------------------|---------------------|------|---------------------------|
| <b>Family history of gastric cancer</b> |                     |      |                           |
| <b>No</b>                               |                     |      |                           |
| Tertile 1                               | 69/99               | 1.00 | Ref.                      |
| Tertile 2                               | 83/87               | 1.19 | (0.75-1.89)               |
| Tertile 3                               | 92/73               | 1.61 | (0.96-2.71) <sup>†</sup>  |
| <i>p</i> -value for trend               |                     |      | 0.065                     |
| <b>Yes</b>                              |                     |      |                           |
| Tertile 1                               | 13/11               | 1.00 | Ref.                      |
| Tertile 2                               | 14/12               | 0.52 | (0.11-2.54)               |
| Tertile 3                               | 19/7                | 4.62 | (0.79-27.07) <sup>†</sup> |
| <i>p</i> -value for trend               |                     |      | 0.040                     |
| <b><i>H. pylori</i> infection</b>       |                     |      |                           |
| <b>No</b>                               |                     |      |                           |
| Tertile 1                               | 36/23               | 1.00 | Ref.                      |
| Tertile 2                               | 32/26               | 0.59 | (0.26-1.36)               |
| Tertile 3                               | 40/18               | 1.09 | (0.45-2.64)               |
| <i>p</i> -value for trend               |                     |      | 0.267                     |
| <b>Yes</b>                              |                     |      |                           |
| Tertile 1                               | 24/53               | 1.00 | Ref.                      |
| Tertile 2                               | 37/44               | 1.74 | (0.84-3.63)               |
| Tertile 3                               | 36/43               | 2.18 | (0.98-4.88) <sup>†</sup>  |
| <i>p</i> -value for trend               |                     |      | 0.020                     |

<sup>†</sup> *p* < 0.1 compared with reference group.

<sup>‡</sup>adjusted for age, sex, body mass index ( $\leq 18.49$ , 18.5-22.99, 23.0-24.99, or  $\geq 25$ ), education level ( $\leq$  elementary school, middle school,  $\geq$  high school, or missing), family history of gastric cancer (no, yes, or unknown), smoking status (never, past, or current smokers), alcohol drinkers (non, past, or current drinkers), total energy intake (continuous), *H. pylori* infection (no, yes, or missing).

In stratification analysis, the stratified variable was excluded from the model.
